1 **Clinical outcomes and cost-effectiveness of**

2 **COVID-19 vaccination in South Africa**

3

4 Krishna P. Reddy<sup>1,2,3,\*</sup>

5 Kieran P. Fitzmaurice<sup>1</sup>

6 Justine A. Scott<sup>1</sup>

7 Guy Harling<sup>4,5,6,7,8</sup>

8 Richard J. Lessells<sup>9</sup>

9 Christopher Panella<sup>1</sup>

10 Fatma M. Shebl<sup>1,3</sup>

11 Kenneth A. Freedberg<sup>1,3,10,11,12</sup>

12 Mark J. Siedner<sup>1,3,4,11</sup>

13

14 **Affiliations**

15 <sup>1</sup> Medical Practice Evaluation Center, Massachusetts General Hospital, Boston, MA, USA

16 <sup>2</sup> Division of Pulmonary and Critical Care Medicine, Massachusetts General Hospital, Boston, MA, USA

17 <sup>3</sup> Harvard Medical School, Boston, MA, USA

18 <sup>4</sup> Africa Health Research Institute, KwaZulu-Natal, South Africa

19 <sup>5</sup> MRC/Wits Rural Public Health & Health Transitions Research Unit (Agincourt), University of the

20 Witwatersrand, South Africa

21 <sup>6</sup> School of Nursing & Public Health, College of Health Sciences, University of KwaZulu-Natal, KwaZulu-

22 Natal, South Africa

23 <sup>7</sup> Institute for Global Health, University College London, London, UK

24 <sup>8</sup> Department of Epidemiology and Harvard Center for Population & Development Studies, Harvard T.H.

25 Chan School of Public Health, Boston, MA, USA

26 <sup>9</sup> KwaZulu-Natal Research Innovation and Sequencing (KRISP), College of Health Sciences,

27 University of KwaZulu-Natal, Durban, South Africa

28 <sup>10</sup> Division of General Internal Medicine, Massachusetts General Hospital, Boston, MA, USA

29 <sup>11</sup> Division of Infectious Diseases, Massachusetts General Hospital, Boston, MA, USA

30 <sup>12</sup> Department of Health Policy and Management, Harvard T.H. Chan School of Public Health, Boston,

31 MA, USA

32

33 **\*Corresponding Author**

34 Krishna P. Reddy, MD, MS

35 Medical Practice Evaluation Center

36 Massachusetts General Hospital

37 100 Cambridge Street, Suite 1600

38 Boston, MA 02114

39 USA

40 Phone: +1 617-726-1993

41 Fax: +1 617-726-4120

42 Email: [kpreddy@mgh.harvard.edu](mailto:kpreddy@mgh.harvard.edu)

43

44 **Keywords:** COVID-19, vaccination, cost-effectiveness, South Africa, resource allocation

45 **Running title:** Cost-effectiveness of COVID-19 vaccination in South Africa

46

47 **ABSTRACT**

48 Low- and middle-income countries are implementing COVID-19 vaccination strategies in light of varying  
49 vaccine efficacies and costs, supply shortages, and resource constraints. Here, we use a microsimulation  
50 model to evaluate clinical outcomes and cost-effectiveness of a COVID-19 vaccination program in South  
51 Africa. We varied vaccination coverage, pace, acceptance, effectiveness, and cost as well as epidemic  
52 dynamics. Providing vaccines to at least 40% of the population and prioritizing vaccine rollout prevented  
53 >9 million infections and >73,000 deaths and reduced costs due to fewer hospitalizations. Model results  
54 were most sensitive to assumptions about epidemic growth and prevalence of prior immunity to SARS-  
55 CoV-2, though the vaccination program still provided high value and decreased both deaths and health  
56 care costs across a wide range of assumptions. Vaccination program implementation factors, including  
57 prompt procurement, distribution, and rollout, are likely more influential than characteristics of the  
58 vaccine itself in maximizing public health benefits and economic efficiency.

59

## 60 INTRODUCTION

61 The development and licensure of COVID-19 vaccines offers a critically important opportunity to curtail  
62 the global COVID-19 pandemic.<sup>1-4</sup> Even before the efficacy and safety of the leading vaccine candidates  
63 were established, many high-income countries (HICs) pre-emptively procured stocks of doses in excess  
64 of population need.<sup>5</sup> By contrast, most low- and middle-income countries (LMICs) do not have access to  
65 sufficient quantities of vaccine due to cost, limitations in available doses, and logistical challenges of  
66 production, distribution, and storage.<sup>6</sup> Meanwhile, the Africa Centres for Disease Control and Prevention  
67 have announced a goal of vaccinating 60% of Africans by the end of 2022.<sup>7</sup>

68  
69 There has been much discussion about reported efficacies and costs of different vaccines. However,  
70 factors specific to implementation, including vaccine supply, vaccination pace, and acceptance among  
71 communities, are increasingly recognized to be crucial to the effectiveness of a vaccination program in  
72 promoting epidemic control in HICs – in some cases, even more so than vaccine efficacy.<sup>8-11</sup> How these  
73 program implementation factors will affect the clinical and health economic consequences of COVID-19  
74 in LMICs has not been well-defined. This is a particularly urgent question given the emergence of SARS-  
75 CoV-2 variants, such as B.1.351 in South Africa, that appear to partially reduce efficacy of some  
76 vaccines.<sup>4,12-15</sup>

77  
78 In this work, we use a microsimulation model to estimate the clinical and economic outcomes of COVID-  
79 19 vaccination programs in South Africa, examining different implementation strategies that  
80 policymakers could directly influence. We simulate COVID-19 specific outcomes over 360 days, including  
81 daily and cumulative infections (detected and undetected), deaths, years-of-life lost (YLL) attributable to  
82 COVID-19 mortality, resource utilization (hospital and intensive care unit [ICU] bed use), and health care  
83 costs from the all-payer (public and private) health sector perspective. We examine different strategies

It is made available under a [CC-BY-NC-ND 4.0 International license](#) .

*Cost-effectiveness of COVID-19 vaccination in South Africa*

84 of vaccination program implementation under multiple scenarios of vaccine effectiveness and epidemic  
85 growth, thereby projecting which factors have the greatest impact on clinical and economic outcomes  
86 and cost-effectiveness. Our goal was to inform vaccination program priorities in South Africa and other  
87 LMICs.

## 88 **RESULTS**

### 89 **Clinical and economic benefits of vaccination strategies**

90 To understand the trade-offs inherent to policy decisions regarding the total vaccine supply to purchase  
91 and the speed with which to administer vaccinations, we compared the clinical and economic outcomes  
92 of different strategies of population coverage (vaccine supply) and vaccination pace. We determined the  
93 incremental cost-effectiveness ratio (ICER) of each strategy as the difference in healthcare costs (2020  
94 USD) divided by the difference in years-of-life saved (YLS) compared with other strategies of supply and  
95 pace. We considered multiple scenarios of epidemic growth, including a scenario in which the effective  
96 reproduction number ( $R_e$ ) varies over time to produce two waves of SARS-CoV-2 infections.

97  
98 In both the  $R_e=1.4$  scenario and the two-wave epidemic scenario, the absence of a vaccination program  
99 resulted in the most infections (~19-21 million) and deaths (70,400-89,300) and highest costs (~\$1.69-  
100 1.77 billion) over the 360-day simulation period (Table 1). Vaccinating 40% of the population decreased  
101 deaths (82-85% reduction) and resulted in the lowest total health care costs (33-45% reduction) in both  
102 scenarios. Increasing the vaccinated population to 67%, the government's target for 2021, decreased  
103 deaths and raised costs in both scenarios. Increasing the vaccine supply to 80%, while simultaneously  
104 increasing vaccine acceptance to 80%, reduced deaths and raised costs even further in both scenarios. In  
105 the  $R_e=1.4$  scenario, the 67% supply strategy was less efficient (had a higher ICER) than the 80% supply  
106 strategy, and the latter had an ICER of \$4,270/YLS compared with the 40% supply strategy. In the two-  
107 wave epidemic scenario, the 67% and 80% supply strategies had ICERs of \$1,990/YLS and \$2,600/YLS. A  
108 vaccine supply of 20%, while less efficient than higher vaccine supply levels, still reduced deaths by 72-  
109 76% and reduced costs by 15-32% compared with no vaccination. The highest vaccination pace, 300,000  
110 vaccinations daily, resulted in the most favorable clinical outcomes and lowest costs compared with  
111 lower paces in both the  $R_e=1.4$  and the two-wave epidemic scenarios (Table 1).

112

113 Supplementary Table 1 details the differences between a reference vaccination program (supply 67%,  
114 pace 150,000 vaccinations/day) and no vaccination program in age-stratified cumulative infections and  
115 deaths, hospital and ICU bed use, and health care costs. The reference vaccination program reduced  
116 hospital bed-days by 67% and ICU bed-days by 54% compared with no vaccination program.

117

118 When varying both vaccine supply and vaccination pace across different scenarios of epidemic growth  
119 ( $R_e$ ), a faster vaccination pace decreased both COVID-19 deaths and total health care costs, while the  
120 impact of a higher vaccine supply on deaths and costs varied (Table 1, Supplementary Table 2). In all  
121 four  $R_e$  scenarios, a vaccination strategy with supply 40% and pace 300,000/day resulted in fewer deaths  
122 and lower costs than a strategy with higher supply (67%) and slower pace (150,000/day). At a  
123 vaccination pace of 300,000/day, increasing the vaccine supply from 40% to 67% was cost-saving in the  
124 two-wave epidemic scenario, while it resulted in ICERs of \$520/YLS when  $R_e=1.4$ , \$1,160/YLS when  
125  $R_e=1.8$ , and \$85,290/YLS when  $R_e=1.1$ .

126

### 127 **Sensitivity analysis: vaccine characteristics and alternative scenarios**

128 To understand the influence of extrinsic factors (i.e., those outside the direct control of vaccination  
129 program decision makers, such as vaccine effectiveness and costs and epidemic growth), we performed  
130 sensitivity analyses in which we varied each of these factors. In each alternative scenario, we projected  
131 clinical and economic outcomes and determined the ICER of a reference vaccination program (67%  
132 vaccine supply, 150,000 vaccinations/day, similar to stated goals in South Africa) compared with no  
133 vaccination program.<sup>16-18</sup>

134

135 In one-way sensitivity analysis, the reference vaccination program remained cost-saving compared with  
136 a scenario without vaccines across different values of effectiveness against infection, effectiveness  
137 against mild/moderate disease, effectiveness against severe/critical disease, and vaccine acceptance  
138 (Table 2). When increasing the cost per person vaccinated up to \$25, the vaccination program remained  
139 cost-saving. At cost per person vaccinated between \$26 and \$75, the vaccination program increased  
140 health care costs compared with a scenario without vaccines, but the ICERs increased only to \$1,500/YLS  
141 (Table 2).

142

143 The reference vaccination program had an ICER  $< \$100/\text{YLS}$  or was cost-saving compared with a scenario  
144 without vaccines across different values of prior immunity (up to 40%), initial prevalence of active  
145 COVID-19, reduction in transmission rate among vaccinated but infected individuals, and costs of  
146 hospital and ICU care (Table 2, Supplementary Table 3). When there was 50% prior immunity, the  
147 vaccination program still reduced deaths but it increased costs, with an ICER of \$22,460/YLS compared  
148 with a scenario without vaccines. Notably, when excluding costs of hospital care and ICU care and only  
149 considering costs of the vaccination program, the program increased costs, but its ICER compared with  
150 no vaccination program was only \$450/YLS (Supplementary Table 3). When several of the main analyses  
151 were repeated with lower costs of hospital and ICU care, some ICERs increased, but vaccine supplies of  
152 40% or 80% remained non-dominated (with the latter providing greater clinical benefit), while a faster  
153 vaccination pace still resulted in greater clinical benefit and lower costs (Supplementary Table 4).

154

155 The influence of different scenarios into which the vaccination program would be introduced on  
156 cumulative infections, deaths, and health care costs is depicted in Figure 1. Varying the prevalence of  
157 prior immunity and  $R_e$  had the greatest influence on both infections and deaths, while varying the cost  
158 per person vaccinated had the greatest influence on health care costs. Vaccine effectiveness against



159 infection and effectiveness against severe disease requiring hospitalization were more influential than  
160 effectiveness against mild/moderate disease in terms of reductions in deaths and costs.

161

### 162 **Multi-way sensitivity analyses**

163 In a multi-way sensitivity analysis in which we simultaneously varied vaccine effectiveness against  
164 infection and cost per person vaccinated, the reference vaccination program was cost-saving compared  
165 with a scenario without vaccines when cost per person vaccinated was \$14.81, even when effectiveness  
166 against infection was as low as 20% (Figure 2). When cost per person vaccinated was \$25, the program  
167 was cost-saving when effectiveness against infection was at least 40%. Even at the highest examined  
168 cost per person vaccinated (\$75) and the lowest examined effectiveness against infection (20%), the  
169 vaccination program had an ICER <\$2,000/YLS compared with no vaccination program (Figure 2).

170

171 We performed several additional multi-way sensitivity analyses in which we simultaneously varied  
172 combinations of vaccine supply, vaccination pace, vaccine effectiveness against infection, cost per  
173 person vaccinated,  $R_e$ , and prevalence of prior immunity (Table 3, Supplementary Figs. 4-8). Of note, to  
174 optimize efficiency, increasing vaccination pace was more important than increasing vaccine supply. At a  
175 cost of \$45 or \$75 per person vaccinated, increasing vaccination pace led to similar or lower ICER  
176 (greater economic efficiency), while increasing vaccine supply led to a similar or higher ICER (less  
177 economic efficiency) (Supplementary Fig. 4). At a cost up to \$25 per person vaccinated, the vaccination  
178 program was cost-saving under nearly all strategies and scenarios (Supplementary Figs. 4-6). Even when  
179 the vaccination program increased costs, the ICERs were <\$2,000/YLS compared with a scenario without  
180 vaccines (Supplementary Figs. 4-6).

181

182 **DISCUSSION**

183 Using a dynamic COVID-19 microsimulation model, we found that vaccinating 67% of South Africa's  
184 population, meeting the government's goal for 2021,<sup>16</sup> would both decrease COVID-19 deaths and  
185 reduce overall health care costs compared with a scenario without vaccines or with a 20% vaccine  
186 supply, by reducing the number of infections, hospitalizations, and ICU admissions. Further increasing  
187 the vaccine supply to 80%, while simultaneously increasing vaccine acceptance, would save even more  
188 lives while modestly increasing costs. Vaccination pace – the number of vaccine doses administered  
189 daily, rather than supply itself, may be most influential to maximizing public health benefits and  
190 economic efficiency. Increasing the pace would reduce both deaths and overall health care costs. The  
191 program remained cost-saving even with conservative estimates of vaccine effectiveness and with  
192 higher per-person vaccination costs, highlighting that the characteristics of vaccination program  
193 implementation are likely to be more influential than the characteristics of the vaccine itself.  
194 Furthermore, the vaccination program remained economically efficient (either cost-saving or with a  
195 relatively low ICER representing good clinical value for additional money spent) across most epidemic  
196 scenarios, including various rates of epidemic growth and a broad range of prevalence of prior  
197 population immunity. Though there is no consensus on an ICER threshold for cost-effectiveness in South  
198 Africa, for context, the country's gross domestic product per capita in 2019 was approximately \$6,000,  
199 and a published South Africa cost-effectiveness threshold from an opportunity cost approach was  
200 approximately \$2,950 (2020 US dollars) per disability-adjusted life-year averted.<sup>19,20</sup>

201

202 Much has been made about differences in the leading vaccine candidates and the impact of variants,  
203 such as the B.1.351 (beta) variant which eventually accounted for over 90% of SARS-CoV-2 infections in  
204 South Africa and the B.1.617.2 (delta) variant, on vaccine effectiveness.<sup>4,15</sup> However, we found that,  
205 even with substantially lower vaccine efficacy than reported in clinical trials, vaccination programs

206 would prevent the majority of COVID-19 deaths compared to scenarios without vaccines. For example,  
207 decreasing vaccine effectiveness against mild/moderate disease and severe/critical disease requiring  
208 hospitalization to 40% still reduced COVID-19 deaths by 65,800 (74%) compared with a scenario without  
209 vaccines. Although efficacy against symptomatic and severe disease have been the focus of vaccine  
210 trials, these parameters were less influential on population-wide health and cost outcomes than efficacy  
211 against infection, which is less commonly reported in trials.<sup>1-4</sup> Nonetheless, the effectiveness ranges we  
212 examined in sensitivity analysis include the point estimates of efficacy against symptomatic and severe  
213 disease reported in clinical trials of the AstraZeneca ChAdOx1, Moderna mRNA-1273, and Pfizer-  
214 BioNTech mRNA BNT162b2 vaccines.<sup>1-3</sup> This suggests that all of these vaccines are likely to have both  
215 health and economic benefits. Furthermore, our sensitivity analysis examining different  $R_e$  scenarios  
216 likely captures the potential influence of more contagious SARS-CoV-2 variants such as delta.

217

218 Similarly, we found that vaccination programs remained economically favorable even at relatively high  
219 vaccination costs. Though we did not explicitly account for all implementation and scale-up costs of a  
220 vaccination program, our estimates of cost per person vaccinated were based on reported costs of both  
221 vaccine and delivery in South Africa.<sup>21-23</sup> Achieving the government's goal of vaccinating 67% of South  
222 Africans within one year will depend at least partially on global vaccine supplies and may require global  
223 policymakers to better fund and facilitate vaccine distribution and accessible pricing for LMICs, in  
224 addition to local attention to delivery infrastructure and community outreach. Although these expenses  
225 may increase program costs, we found that the vaccination program would remain cost-saving at a  
226 vaccination cost up to \$25/person and likely cost-effective even at per-person vaccination cost up to  
227 \$75/person (ICER \$1,500/YLS). This is due to cost offsets in preventing hospitalizations.

228

229 A faster pace of vaccination consistently decreased infections, deaths, and costs across a range of  
230 epidemic growth scenarios. Yet, this was not always true of a higher vaccine supply. With lower  
231 epidemic growth ( $R_e=1.1$ ), which approximates the basic reproduction number in the intra-wave periods  
232 in South Africa, a faster pace remained preferable from a clinical and economic standpoint. But with the  
233 faster vaccination pace, increasing the proportion of the population vaccinated from 40% to 67%  
234 resulted in higher costs while only modestly reducing years-of-life lost, with an ICER of \$85,290/YLS, well  
235 above commonly reported willingness-to-pay thresholds in South Africa.<sup>20,24–27</sup> By contrast, when a  
236 higher epidemic growth rate is seen ( $R_e=1.8$ ), as was documented during the first and second waves in  
237 South Africa, a faster vaccination pace remained highly preferable, and increasing the proportion of the  
238 population vaccinated from 40% to 67% resulted in fewer years-of-life lost and higher costs with a much  
239 lower ICER of \$1,160/YLS. Overall, these results demonstrate the importance of rolling out vaccinations  
240 quickly, particularly ahead of any future waves of the epidemic. Consequently, policymakers should  
241 invest in establishing a vaccine distribution and administration system to ensure vaccines will be  
242 administered as promptly as possible. All available distribution channels, including those in public and  
243 private sectors, should be leveraged.

244

245 Our model projections were sensitive to  $R_e$  and to the prevalence of prior immunity to SARS-CoV-2.  
246 However, vaccination was generally economically efficient even in scenarios of very low epidemic  
247 growth, albeit in some instances with a lower supply target. When the prevalence of prior protective  
248 immunity was increased to 50%, the ICER rose substantially. We assumed that prior infection protects  
249 against another SARS-CoV-2 infection for the duration of the simulation period. If this is not the case,  
250 either because immunity wanes or viral variants make prior infection poorly protective against re-  
251 infection, as appeared to be seen in the second waves in South Africa and Brazil, then the vaccination  
252 program could still provide good value even with a high prevalence of prior infection.<sup>28,29</sup>

253

254 These results should be interpreted within the context of several limitations. We assumed that vaccine  
255 effectiveness was constant starting 14 days after administration and continuing throughout the 360-day  
256 simulation. Early data suggest that post-vaccination immunity lasts at least for months.<sup>1-3,30,31</sup> Our model  
257 assumes homogeneous mixing of the entire population. This assumption may result in conservative  
258 estimates of cost-effectiveness of vaccination, particularly at lower supply levels, because herd  
259 immunity is likely to be achieved at lower rates of vaccination after accounting for heterogeneous  
260 mixing.<sup>32</sup> There may be economies of scale such that the cost per person vaccinated decreases as the  
261 vaccine supply or vaccination pace increase and vaccination program resources are used more  
262 efficiently. Our modeled vaccination prioritization was based exclusively on age and not on employment  
263 type, comorbidity presence, or urban/rural heterogeneity in epidemiology or vaccination delivery.  
264 Vaccination programs that reach vulnerable and disadvantaged groups would likely improve population-  
265 level health outcomes and health equity. Long-term disability among some of those who recover from  
266 COVID-19 is an important consideration for policymakers not captured by our model, which considers  
267 only years-of-life lost due to premature mortality. Our vaccination cost-effectiveness results may  
268 therefore be conservative, particularly among younger age groups that are less likely to die from COVID-  
269 19 but are still at risk for long-term sequelae.<sup>33</sup> We did not consider the impact of COVID-19 or  
270 vaccination on other health care programs (e.g., HIV and tuberculosis care). We assessed costs from a  
271 health care sector perspective and did not account for other sector costs associated with lockdowns and  
272 failure to achieve epidemic suppression (e.g., macroeconomic factors such as job and productivity losses  
273 and microeconomic factors such as reduced household income and disruptions to education).<sup>34,35</sup>  
274 Excluding these costs may underestimate the true value of COVID-19 vaccination to society. We did not  
275 explicitly model the use of non-pharmaceutical interventions (NPIs) as a standalone strategy or in  
276 combination with vaccination. However, the evaluation of various transmission scenarios (including a

277 sensitivity analysis in which  $R_0$  changes over time) captures the potential impacts of different levels of  
278 NPI implementation on clinical outcomes. As with all modeling exercises, our results are contingent on  
279 assumptions and input parameters. Primary assumptions in our model included initial prevalence of  
280 COVID-19, prevalence of prior immunity, time to vaccine rollout, and vaccine efficacy against  
281 asymptomatic infection.

282

283 Given data limitations and the uncertainty in making long-term projections, we limited the time horizon  
284 of our analysis to one year. The sustainability and cost-effectiveness of vaccination beyond one year is  
285 likely to depend on the duration of protection conferred by existing vaccines, their effectiveness against  
286 emergent variants, and the costs, effectiveness, and frequency of potential booster shots—factors  
287 which remain unknown as of June 2021. If SARS-CoV-2 becomes endemic, cost-effectiveness analysis  
288 will become increasingly critical for integrating vaccination programs within health program budgets.

289

290 In summary, we found that a COVID-19 vaccination program would reduce infections and deaths and  
291 likely reduce overall health care costs in South Africa across a range of possible scenarios, even with  
292 conservative assumptions around vaccine effectiveness. Our model simulations underscore that in South  
293 Africa and similar settings, acquisition and rapid distribution of vaccines should be prioritized over  
294 relatively small differences in vaccine effectiveness and price. The pace of vaccination is as or more  
295 important than population coverage, and therefore attention to vaccination program infrastructure is  
296 critical. Non-pharmaceutical practices such as mask wearing and physical distancing remain crucial to  
297 reduce epidemic growth while vaccination programs are being implemented.<sup>10</sup> Policymakers can use our  
298 results to guide decisions about vaccine selection, supply, and distribution to maximally reduce the  
299 deleterious impact of the COVID-19 pandemic in South Africa.

300

301 **METHODS**

302 **Analytic overview**

303 We used the Clinical and Economic Analysis of COVID-19 Interventions (CEACOV) dynamic state-  
304 transition Monte Carlo microsimulation model to reflect COVID-19 natural history, vaccination, and  
305 treatment.<sup>36</sup> We previously used the CEACOV model to project COVID-19 clinical and economic  
306 outcomes in a variety of settings, including an analysis of non-pharmaceutical public health  
307 interventions in South Africa.<sup>24,37–39</sup>

308

309 Starting with SARS-CoV-2 active infection prevalence of 0.1% (or approximately 60,000 active cases,  
310 roughly 10 times the number reported in the first 10 days of April 2021), we projected clinical and  
311 economic outcomes over 360 days, including daily and cumulative infections, deaths, hospital and ICU  
312 bed use, and health care costs without discounting.<sup>40</sup> Outside the model, we calculated the mean  
313 lifetime years-of-life saved (YLS) from each averted COVID-19 death during the 360-day model horizon,  
314 stratified by age (mean 17.77 YLS per averted COVID-19 death across all individuals, Supplementary  
315 Methods). We did not include costs beyond the 360-day model horizon.<sup>24</sup> We determined the  
316 incremental cost-effectiveness ratio (ICER), the difference in health care costs (2020 US dollars) divided  
317 by the difference in life-years between different vaccination strategies. Our ICER estimates include  
318 health care costs during the 360-day model horizon and YLS over a lifetime from averted COVID-19  
319 deaths during the 360-day model horizon.<sup>24</sup> “Cost-saving” strategies were those resulting in higher  
320 clinical benefits (fewer life-years lost) and lower costs than an alternative.

321

322

323

324

325 **Model structure**

326 In each simulation, we assumed a fixed supply of vaccine that would be administered to eligible and  
327 willing individuals regardless of history of SARS-CoV-2 infection. Available vaccine doses would first be  
328 offered to those aged  $\geq 60$  years, then to those aged 20-59 years, and finally to those aged  $< 20$  years.<sup>41</sup>

329

330 In the base case, we applied characteristics of Ad26.COV2.S (Johnson & Johnson/Janssen), a single-dose  
331 vaccine for which administration in South Africa began through a phase 3b study in health care workers  
332 in February 2021.<sup>4,42</sup> To reflect possible implementation of other vaccines, as well as published data and  
333 uncertainties around the type of protection provided by each vaccine, we varied vaccine effectiveness  
334 against SARS-CoV-2 infection, effectiveness against mild/moderate COVID-19 disease, and effectiveness  
335 against severe COVID-19 disease requiring hospitalization. We assumed that a single vaccine dose would  
336 be given and did not explicitly model a two-dose schedule.

337

338 At model initiation, each individual is either susceptible to SARS-CoV-2, infected with SARS-CoV-2, or  
339 immune (by way of prior infection). Each susceptible individual faces a daily probability of SARS-CoV-2  
340 infection. Once infected, an individual moves to the pre-infectious latency state and faces age-  
341 dependent probabilities of developing asymptomatic, mild/moderate, severe, or critical disease  
342 (Supplementary Methods, Supplementary Table 5, Supplementary Fig. 1). Individuals with severe or  
343 critical disease are referred to hospitals and ICUs, respectively. If hospital/ICU bed capacity has been  
344 reached, the individual receives the next lower available intervention, which is associated with different  
345 mortality risk and cost (e.g., if a person needs ICU care when no ICU beds are available, they receive  
346 non-ICU hospital care). Details of COVID-19 transmission, natural history, and hospital care in the model  
347 are described elsewhere and in the Supplementary Methods.<sup>24</sup>

348



349 **Input parameters**

350 We defined the age distribution based on 2019 South Africa population estimates, in which 37% were  
351 aged <20 years, 54% were 20-59 years, and 9% were  $\geq 60$  years (Table 3).<sup>43</sup> We assumed in the base case  
352 that, at model initiation, 30% had prior infection and were immune to repeat infection. This assumption  
353 was based on an estimate of the proportion of South Africa's population that had been exposed to the  
354 B.1.351 variant by 30 January 2021 (Supplementary Methods).<sup>15,44-46</sup>

355  
356 In the reference vaccination program strategy we assumed: a) there would be a sufficient supply of  
357 vaccine doses to fully vaccinate 67% of South Africa's population (approximately 40 million vaccinated  
358 people);<sup>16</sup> b) pace of vaccination was 150,000 doses/day.<sup>17,18</sup> Our comparisons of different vaccination  
359 program strategies included varying the vaccine supply to that sufficient to cover 0-80% of South Africa's  
360 population and increasing the pace of vaccination up to 300,000 doses/day. In the base case, we  
361 assumed that vaccine uptake among those eligible was 67%, accounting for vaccine hesitancy and failure  
362 to reach some individuals.<sup>47,48</sup> Vaccine effectiveness was 40% against infection, 51% against  
363 mild/moderate disease, and 86% against severe or critical disease requiring hospitalization. The latter  
364 two were based on reported efficacies of the Johnson & Johnson/Janssen vaccine  $\geq 14$  days post-  
365 vaccination in South Africa.<sup>4</sup>

366  
367 Supplementary Table 5 indicates daily disease progression probabilities, age-dependent probabilities of  
368 developing severe or critical disease, and age-dependent mortality probabilities for those with critical  
369 disease. We stratified transmission rates by disease state, adjusting them to reflect an initial effective  
370 reproduction number ( $R_e$ )=1.4 in the base case.<sup>49</sup> We also simulated alternative epidemic growth  
371 scenarios with lower or higher initial  $R_e$  and a scenario in which there were episodic surges above a

372 lower background basic reproduction number ( $R_0$ ), as observed in the South Africa epidemic over the  
373 past year (Supplementary Methods).

374

375 The maximum availability of hospital and ICU beds per day was 119,400 and 3,300 (Table 3).<sup>50</sup> We  
376 applied vaccination costs and daily costs of hospital care and ICU care based on published estimates  
377 and/or cost quotes obtained in South Africa (Table 3 and Supplementary Methods). In the base case, we  
378 applied a total vaccination cost of \$14.81 per person, based on estimated costs in South Africa of  
379 \$10/dose for the vaccine and \$4.81/dose for service and delivery (Supplementary Methods).<sup>21–23</sup> We  
380 varied vaccination costs in sensitivity analyses.

381

### 382 **Validation**

383 We previously validated our natural history assumptions by comparing model-projected COVID-19  
384 deaths with those reported in South Africa.<sup>24</sup> We updated our validation by comparing the model-  
385 projected number of COVID-19 infections and deaths with the number of cases and deaths reported in  
386 South Africa through 10 April 2021, accounting for underreporting (Supplementary Methods,  
387 Supplementary Fig. 3).<sup>40,51</sup>

388

### 389 **Sensitivity analysis**

390 We used sensitivity analysis to examine the relative influence on clinical and cost projections of various  
391 parameters around vaccine characteristics and epidemic growth (Table 3). Specifically, we varied:  
392 vaccine acceptance (50-90% among eligible individuals); vaccine effectiveness in preventing infection  
393 (20-75%), mild/moderate disease (29-79%), and severe/critical disease requiring hospitalization (40-  
394 98%); cost (\$9-75/person); initial prevalence of COVID-19 disease (0.05-0.5%); initial  $R_e$  (1.1-1.8); prior  
395 immunity (10-50% of population); reduction in transmission rate among vaccinated but infected

396 individuals (0-50%); and hospital and ICU daily costs (0.5x-2.0x base case costs). The ranges of vaccine  
397 effectiveness against mild/moderate disease and severe/critical disease requiring hospitalization were  
398 based on efficacies and 95% confidence intervals reported in the Johnson & Johnson/Janssen vaccine  
399 trial (Supplementary Methods).<sup>4</sup> We also examined ICERs when the relatively high costs of ICU care were  
400 excluded and when all hospital care costs (non-ICU and ICU) were excluded. We performed multi-way  
401 sensitivity analyses in which we simultaneously varied parameters influential in one-way sensitivity  
402 analyses.  
403

404 **DATA AVAILABILITY**

405 This modeling study involved the use of published or publicly available data. The data used and the  
406 sources are described in the Manuscript and Supplementary Information. No primary data were  
407 collected for this study. Model flowcharts are in the Supplementary Information.

408

409 **CODE AVAILABILITY**

410 The simulation model code is available at <https://zenodo.org/record/5565320>

411 (doi:10.5281/zenodo.5565320).

412

413 **REFERENCES**

- 414 1. Voysey, M. *et al.* Safety and efficacy of the ChAdOx1 nCoV-19 vaccine (AZD1222) against SARS-CoV-  
415 2: an interim analysis of four randomised controlled trials in Brazil, South Africa, and the UK. *Lancet*  
416 **397**, 99–111 (2021).
- 417 2. Polack, F. P. *et al.* Safety and efficacy of the BNT162b2 mRNA Covid-19 vaccine. *N Engl J Med* **383**,  
418 2603–2615 (2020).
- 419 3. Baden, L. R. *et al.* Efficacy and safety of the mRNA-1273 SARS-CoV-2 vaccine. *N Engl J Med* **384**, 403–  
420 416 (2021).
- 421 4. Sadoff, J. *et al.* Safety and efficacy of single-dose Ad26.COV2.S vaccine against Covid-19. *N Engl J*  
422 *Med* **384**, 2187–2201 (2021).
- 423 5. Torjesen, I. Covid-19: Pre-purchasing vaccine—sensible or selfish? *BMJ* **370**, m3226 (2020).
- 424 6. Nkengasong, J. N., Ndembi, N., Tshangela, A. & Raji, T. COVID-19 vaccines: how to ensure Africa has  
425 access. *Nature* **586**, 197–199 (2020).
- 426 7. Reuters Staff. Africa foresees 60% of people vaccinated against COVID in two to three years. *Reuters*  
427 <https://www.reuters.com/article/us-health-coronavirus-africa-idUSKBN28D1D3> (2020).
- 428 8. Paltiel, A. D., Schwartz, J. L., Zheng, A. & Walensky, R. P. Clinical outcomes of a COVID-19 vaccine:  
429 implementation over efficacy. *Health Aff (Millwood)* **40**, 42–52 (2021).
- 430 9. Paltiel, A. D., Zheng, A. & Schwartz, J. L. Speed versus efficacy: quantifying potential tradeoffs in  
431 COVID-19 vaccine deployment. *Ann Intern Med* (2021).
- 432 10. Giordano, G. *et al.* Modeling vaccination rollouts, SARS-CoV-2 variants and the requirement for non-  
433 pharmaceutical interventions in Italy. *Nat Med* **27**, 993–998 (2021).
- 434 11. Sah, P. *et al.* Accelerated vaccine rollout is imperative to mitigate highly transmissible COVID-19  
435 variants. *EClinicalMedicine* **35**, 100865 (2021).
- 436 12. Liu, Y. *et al.* Neutralizing activity of BNT162b2-elicited serum. *N Engl J Med* **384**, 1466–1468 (2021).

- 437 13. Madhi, S. A. *et al.* Efficacy of the ChAdOx1 nCoV-19 Covid-19 vaccine against the B.1.351 variant. *N*  
438 *Engl J Med* **384**, 1885–1898 (2021).
- 439 14. Shinde, V. *et al.* Efficacy of NVX-CoV2373 Covid-19 Vaccine against the B. 1.351 Variant. *N Engl J*  
440 *Med* **384**, 1899–1909 (2021).
- 441 15. Tegally, H. *et al.* Detection of a SARS-CoV-2 variant of concern in South Africa. *Nature* **592**, 438–443  
442 (2021).
- 443 16. COVID-19 Coronavirus vaccine strategy | South African Government. [https://www.gov.za/covid-](https://www.gov.za/covid-19/vaccine/strategy)  
444 [19/vaccine/strategy](https://www.gov.za/covid-19/vaccine/strategy) (2021).
- 445 17. Parliament of the Republic of South Africa. Portfolio Committee on Health’s Zoom Meeting, 7  
446 January 2021. [https://www.youtube.com/watch?v=jTZfp\\_\\_pykY](https://www.youtube.com/watch?v=jTZfp__pykY) (2021).
- 447 18. Matiwane, Z. Covid-19 vaccine rollout: 200,000-a-day jabs plan unveiled. *TimesLIVE*  
448 [https://www.timeslive.co.za/sunday-times/news/2021-03-28-covid-19-vaccine-rollout-200000-a-](https://www.timeslive.co.za/sunday-times/news/2021-03-28-covid-19-vaccine-rollout-200000-a-day-jabs-plan-unveiled/)  
449 [day-jabs-plan-unveiled/](https://www.timeslive.co.za/sunday-times/news/2021-03-28-covid-19-vaccine-rollout-200000-a-day-jabs-plan-unveiled/) (2021).
- 450 19. The World Bank. GDP per capita (current US\$) - South Africa.  
451 <https://data.worldbank.org/indicator/NY.GDP.PCAP.CD?locations=ZA> (2021).
- 452 20. Edoaka, I. P. & Stacey, N. K. Estimating a cost-effectiveness threshold for health care decision-making  
453 in South Africa. *Health Policy Plan* **35**, 546–555 (2020).
- 454 21. Reuters Staff. J&J, African Union in deal for up to 400 million COVID-19 shots. *Reuters*  
455 <https://www.reuters.com/article/uk-health-coronavirus-j-j-vaccine-idUSKBN2BL1V4> (2021).
- 456 22. Business Insider South Africa. SA is the first country to roll out Johnson & Johnson vaccine - what  
457 you need to know about the jab. [https://www.businessinsider.co.za/covid-19-vaccine-johnson-](https://www.businessinsider.co.za/covid-19-vaccine-johnson-johnson-what-we-know-2020-12)  
458 [johnson-what-we-know-2020-12](https://www.businessinsider.co.za/covid-19-vaccine-johnson-johnson-what-we-know-2020-12) (2021).
- 459 23. Moodley, I., Tathiah, N. & Sartorius, B. The costs of delivering human papillomavirus vaccination to  
460 Grade 4 learners in KwaZulu-Natal, South Africa. *S Afr Med J* **106**, 497–501 (2016).

- 461 24. Reddy, K. P. *et al.* Cost-effectiveness of public health strategies for COVID-19 epidemic control in  
462 South Africa: a microsimulation modelling study. *Lancet Glob Health* **9**, e120–e129 (2021).
- 463 25. Reddy, K. P. *et al.* Cost-effectiveness of urine-based tuberculosis screening in hospitalised patients  
464 with HIV in Africa: a microsimulation modelling study. *Lancet Glob Health* **7**, e200–e208 (2019).
- 465 26. Woods, B., Revill, P., Sculpher, M. & Claxton, K. Country-level cost-effectiveness thresholds: initial  
466 estimates and the need for further research. *Value Health* **19**, 929–935 (2016).
- 467 27. Meyer-Rath, G., van Rensburg, C., Larson, B., Jamieson, L. & Rosen, S. Revealed willingness-to-pay  
468 versus standard cost-effectiveness thresholds: evidence from the South African HIV Investment  
469 Case. *PLoS One* **12**, e0186496 (2017).
- 470 28. Sabino, E. C. *et al.* Resurgence of COVID-19 in Manaus, Brazil, despite high seroprevalence. *Lancet*  
471 **397**, 452–455 (2021).
- 472 29. Cele, S. *et al.* Escape of SARS-CoV-2 501Y.V2 from neutralization by convalescent plasma. *Nature*  
473 **593**, 142–146 (2021).
- 474 30. Widge, A. T. *et al.* Durability of responses after SARS-CoV-2 mRNA-1273 vaccination. *N Engl J Med*  
475 **384**, 80–82 (2021).
- 476 31. Doria-Rose, N. *et al.* Antibody persistence through 6 months after the second dose of mRNA-1273  
477 vaccine for Covid-19. *N Engl J Med* **384**, 2259–2261 (2021).
- 478 32. Britton, T., Ball, F. & Trapman, P. A mathematical model reveals the influence of population  
479 heterogeneity on herd immunity to SARS-CoV-2. *Science* **369**, 846–849 (2020).
- 480 33. Briggs, A. & Vassall, A. Count the cost of disability caused by COVID-19. *Nature* **593**, 502–505 (2021).
- 481 34. Statistics South Africa. Quarterly Labour Force Survey. Quarter 4: 2020.  
482 <http://www.statssa.gov.za/publications/P0211/P02114thQuarter2020.pdf> (2021).
- 483 35. National Treasury, Republic of South Africa. Budget Review.  
484 <http://www.treasury.gov.za/documents/national%20budget/2021/review/FullBR.pdf> (2021).

- 485 36. Panella, C. & Talbot, V.R. Cost-effectiveness of COVID-19 vaccination in South Africa. CEACOV v0.8.  
486 Available at <https://zenodo.org/record/5565320>, doi:10.5281/zenodo.5565320 (2021).
- 487 37. Neilan, A. M. *et al.* Clinical impact, costs, and cost-effectiveness of expanded SARS-CoV-2 testing in  
488 Massachusetts. *Clin Infect Dis* (2020).
- 489 38. Baggett, T. P. *et al.* Clinical outcomes, costs, and cost-effectiveness of strategies for adults  
490 experiencing sheltered homelessness during the COVID-19 pandemic. *JAMA Netw Open* **3**,  
491 e2028195 (2020).
- 492 39. Losina, E. *et al.* College campuses and COVID-19 mitigation: clinical and economic value. *Ann Intern*  
493 *Med* **174**, 472–483 (2020).
- 494 40. National Institute for Communicable Diseases. National COVID-19 Daily Report.  
495 [https://www.nicd.ac.za/diseases-a-z-index/covid-19/surveillance-reports/national-covid-19-daily-](https://www.nicd.ac.za/diseases-a-z-index/covid-19/surveillance-reports/national-covid-19-daily-report/)  
496 [report/](https://www.nicd.ac.za/diseases-a-z-index/covid-19/surveillance-reports/national-covid-19-daily-report/) (2021).
- 497 41. Pfizer. Pfizer-BioNTech announce positive topline results of pivotal COVID-19 vaccine study in  
498 adolescents. [https://www.pfizer.com/news/press-release/press-release-detail/pfizer-biontech-](https://www.pfizer.com/news/press-release/press-release-detail/pfizer-biontech-announce-positive-topline-results-pivotal)  
499 [announce-positive-topline-results-pivotal](https://www.pfizer.com/news/press-release/press-release-detail/pfizer-biontech-announce-positive-topline-results-pivotal) (2021).
- 500 42. Arthur, R. South Africa starts administering Janssen COVID-19 vaccine to health workers.  
501 *biopharma-reporter.com* [https://www.biopharma-reporter.com/Article/2021/02/18/South-Africa-](https://www.biopharma-reporter.com/Article/2021/02/18/South-Africa-starts-administering-Janssen-COVID-19-vaccine-to-health-workers)  
502 [starts-administering-Janssen-COVID-19-vaccine-to-health-workers](https://www.biopharma-reporter.com/Article/2021/02/18/South-Africa-starts-administering-Janssen-COVID-19-vaccine-to-health-workers) (2021).
- 503 43. Statistics South Africa. Mid-year population estimates 2019.  
504 <https://www.statssa.gov.za/publications/P0302/P03022019.pdf> (2019).
- 505 44. National Institute for Communicable Diseases. *COVID-19 Weekly Epidemiology Brief - Week 4, 2021.*  
506 [https://www.nicd.ac.za/diseases-a-z-index/covid-19/surveillance-reports/weekly-epidemiological-](https://www.nicd.ac.za/diseases-a-z-index/covid-19/surveillance-reports/weekly-epidemiological-brief/)  
507 [brief/](https://www.nicd.ac.za/diseases-a-z-index/covid-19/surveillance-reports/weekly-epidemiological-brief/).



- 508 45. Sykes, W. *et al.* Prevalence of anti-SARS-CoV-2 antibodies among blood donors in Northern Cape,  
509 KwaZulu-Natal, Eastern Cape, and Free State provinces of South Africa in January 2021. Preprint at  
510 doi:10.21203/rs.3.rs-233375/v1 (2021).
- 511 46. National Institute for Communicable Diseases. *COVID-19 Weekly Epidemiology Brief - Week 46,*  
512 *2020.* [https://www.nicd.ac.za/wp-content/uploads/2020/11/COVID-19-Weekly-Epidemiology-Brief-](https://www.nicd.ac.za/wp-content/uploads/2020/11/COVID-19-Weekly-Epidemiology-Brief-week-46.pdf)  
513 [week-46.pdf](https://www.nicd.ac.za/wp-content/uploads/2020/11/COVID-19-Weekly-Epidemiology-Brief-week-46.pdf) (2020).
- 514 47. Larson, H. J. *et al.* The state of vaccine confidence 2016: global insights through a 67-country survey.  
515 *EBioMedicine* **12**, 295–301 (2016).
- 516 48. Runciman, C., Roberts, B., Alexander, K., Bohler-Muller, N. & Bekker, M. UJ-HSRC Covid-19  
517 Democracy Survey. Willingness to take a Covid-19 vaccine: A research briefing.  
518 [http://www.hsrc.ac.za/uploads/pageContent/1045085/2021-01-](http://www.hsrc.ac.za/uploads/pageContent/1045085/2021-01-25%20Vaccine%20briefing%20(final).pdf)  
519 [25%20Vaccine%20briefing%20\(final\).pdf](http://www.hsrc.ac.za/uploads/pageContent/1045085/2021-01-25%20Vaccine%20briefing%20(final).pdf) (2021).
- 520 49. Covid-19: Estimates for South Africa. *Covid-19* [https://epiforecasts.io/covid/posts/national/south-](https://epiforecasts.io/covid/posts/national/south-africa/)  
521 [africa/](https://epiforecasts.io/covid/posts/national/south-africa/) (2020).
- 522 50. COVID-19 Public Health Response - SA Corona Virus Online Portal. *SA Corona Virus Online Portal*  
523 <https://sacoronavirus.co.za/2020/04/11/covid-19-public-health-response/> (2020).
- 524 51. National Institute for Communicable Diseases. COVID-19 Weekly Hospital Surveillance Update -  
525 Week 14, 2021. [https://www.nicd.ac.za/wp-content/uploads/2021/04/NICD-COVID-19-Weekly-](https://www.nicd.ac.za/wp-content/uploads/2021/04/NICD-COVID-19-Weekly-Hospital-Surveillance-update-Week-14-2021.pdf)  
526 [Hospital-Surveillance-update-Week-14-2021.pdf](https://www.nicd.ac.za/wp-content/uploads/2021/04/NICD-COVID-19-Weekly-Hospital-Surveillance-update-Week-14-2021.pdf) (2021).
- 527 52. Netcare Hospitals. 2019 Tariffs. [https://www.netcarehospitals.co.za/Portals/3/Images/Content-](https://www.netcarehospitals.co.za/Portals/3/Images/Content-images/PDF/2019-Private-Paying-Patients.pdf)  
528 [images/PDF/2019-Private-Paying-Patients.pdf](https://www.netcarehospitals.co.za/Portals/3/Images/Content-images/PDF/2019-Private-Paying-Patients.pdf) (2019).
- 529 53. Edoka, I., Fraser, H., Jamieson, L., Meyer-Rath, G. & Mdewa, W. Inpatient care costs of COVID-19 in  
530 South Africa's public healthcare system. *International Journal of Health Policy and Management*  
531 (2021).

- 532 54. Consumer Price Index: All Items for South Africa. *FRED, Federal Reserve Bank of St. Louis*
- 533 <https://fred.stlouisfed.org/series/ZAFCPALLMINMEI> (2021).
- 534 55. South Africa / U.S. Foreign Exchange Rate. *FRED, Federal Reserve Bank of St. Louis*
- 535 <https://fred.stlouisfed.org/series/DEXSFUS> (2021).
- 536 56. Mahomed, S. & Mahomed, O. H. Cost of intensive care services at a central hospital in South Africa.
- 537 *S Afr Med J* **109**, 35–39 (2019).
- 538

539 **ACKNOWLEDGEMENTS**

540 This research was supported by the National Institute of Allergy and Infectious Diseases of the National  
541 Institutes of Health [R37 AI058736-16S1] (KAF) and by the Wellcome Trust [Grant number  
542 210479/Z/18/Z] (GH). For the purpose of open access, the author has applied a CC BY public copyright  
543 license to any Author Accepted Manuscript version arising from this submission.

544

545 The funding sources had no role in the study design, data collection, data analysis, data interpretation,  
546 writing of the manuscript, or in the decision to submit the manuscript for publication. The content is  
547 solely the responsibility of the authors and does not necessarily represent the official views of the  
548 funding sources.

549

550 The authors thank Nattanicha Wattananimitgul, Eli Schwamm, and Nora Mulroy for technical assistance.

551

552 **AUTHOR CONTRIBUTIONS**

553 All authors contributed substantively to this manuscript in the following ways: study and model design  
554 (KPR, KPF, JAS, GH, RJL, CP, FMS, KAF, MJS), data analysis (KPR, KPF, JAS, FMS, KAF, MJS), interpretation  
555 of results (KPR, KPF, JAS, GH, RJL, CP, FMS, KAF, MJS), drafting the manuscript (KPR, MJS), critical  
556 revision of the manuscript (KPR, KPF, JAS, GH, RJL, CP, FMS, KAF, MJS) and final approval of the  
557 submitted version (KPR, KPF, JAS, GH, RJL, CP, FMS, KAF, MJS).

558

559 **COMPETING INTERESTS**

560 RJL serves on South Africa's Ministerial Advisory Committee on COVID-19 Vaccines (VMAC). We declare  
561 no additional competing interests.

562 **Table 1. Clinical and economic outcomes of different COVID-19 vaccination program strategies of vaccine supply and vaccination pace under**  
 563 **different scenarios of epidemic growth in South Africa.**

| Scenario and Vaccination Strategy                     | Cumulative SARS-CoV-2 infections | Cumulative COVID-19 deaths | Years-of-life lost | Health care costs, USD | ICER, USD per year-of-life saved <sup>a</sup> |
|-------------------------------------------------------|----------------------------------|----------------------------|--------------------|------------------------|-----------------------------------------------|
| <b>Vaccine supply</b>                                 |                                  |                            |                    |                        |                                               |
| <i>R<sub>e</sub> = 1.4</i>                            |                                  |                            |                    |                        |                                               |
| Vaccine supply 40%                                    | 11,784,700                       | 16,000                     | 275,800            | 1,177,742,900          | --                                            |
| Vaccine supply 67%                                    | 10,585,100                       | 14,700                     | 259,600            | 1,338,803,500          | Dominated                                     |
| Vaccine supply 80% <sup>b</sup>                       | 10,410,000                       | 12,000                     | 217,900            | 1,425,272,800          | 4,270                                         |
| Vaccine supply 20%                                    | 15,489,500                       | 21,800                     | 397,300            | 1,508,890,800          | Dominated                                     |
| No vaccination                                        | 21,012,100                       | 89,300                     | 1,558,700          | 1,766,856,200          | Dominated                                     |
| <i>Two-wave epidemic<sup>c</sup></i>                  |                                  |                            |                    |                        |                                               |
| Vaccine supply 40%                                    | 7,758,800                        | 10,600                     | 175,100            | 927,247,000            | --                                            |
| Vaccine supply 67%                                    | 5,594,000                        | 7,800                      | 133,700            | 1,009,741,300          | 1,990                                         |
| Vaccine supply 80% <sup>b</sup>                       | 5,940,500                        | 6,900                      | 119,100            | 1,047,885,500          | 2,600                                         |
| Vaccine supply 20%                                    | 12,765,900                       | 19,900                     | 371,500            | 1,148,772,700          | Dominated                                     |
| No vaccination                                        | 19,290,400                       | 70,400                     | 1,206,200          | 1,691,805,000          | Dominated                                     |
| <b>Vaccination pace</b>                               |                                  |                            |                    |                        |                                               |
| <i>R<sub>e</sub> = 1.4</i>                            |                                  |                            |                    |                        |                                               |
| Pace 300,000 vaccinations per day                     | 5,659,400                        | 7,200                      | 120,300            | 1,016,586,100          | --                                            |
| Pace 200,000 vaccinations per day                     | 8,191,900                        | 9,600                      | 151,300            | 1,123,694,300          | Dominated                                     |
| Pace 150,000 vaccinations per day                     | 10,585,100                       | 14,700                     | 259,600            | 1,338,803,500          | Dominated                                     |
| No vaccination                                        | 21,012,100                       | 89,300                     | 1,558,700          | 1,766,856,200          | Dominated                                     |
| <i>Two-wave epidemic<sup>c</sup></i>                  |                                  |                            |                    |                        |                                               |
| Pace 300,000 vaccinations per day                     | 2,697,100                        | 3,200                      | 49,300             | 780,133,600            | --                                            |
| Pace 200,000 vaccinations per day                     | 4,148,500                        | 5,900                      | 90,300             | 881,291,000            | Dominated                                     |
| Pace 150,000 vaccinations per day                     | 5,594,000                        | 7,800                      | 133,700            | 1,009,741,300          | Dominated                                     |
| No vaccination                                        | 19,290,400                       | 70,400                     | 1,206,200          | 1,691,805,000          | Dominated                                     |
| <b>Vaccine supply and vaccination pace</b>            |                                  |                            |                    |                        |                                               |
| <i>R<sub>e</sub> = 1.4</i>                            |                                  |                            |                    |                        |                                               |
| Vaccine supply 40%, pace 300,000 vaccinations per day | 9,866,800                        | 13,000                     | 211,300            | 969,576,100            | --                                            |
| Vaccine supply 67%, pace 300,000 vaccinations per day | 5,659,400                        | 7,200                      | 120,300            | 1,016,586,100          | 520                                           |

|                                                       |            |        |           |               |           |
|-------------------------------------------------------|------------|--------|-----------|---------------|-----------|
| Vaccine supply 40%, pace 150,000 vaccinations per day | 11,784,700 | 16,000 | 275,800   | 1,177,742,900 | Dominated |
| Vaccine supply 67%, pace 150,000 vaccinations per day | 10,585,100 | 14,700 | 259,600   | 1,338,803,500 | Dominated |
| No vaccination                                        | 21,012,100 | 89,300 | 1,558,700 | 1,766,856,200 | Dominated |
| Two-wave epidemic <sup>c</sup>                        |            |        |           |               |           |
| Vaccine supply 67%, pace 300,000 vaccinations per day | 2,697,100  | 3,200  | 49,300    | 780,133,600   | --        |
| Vaccine supply 40%, pace 300,000 vaccinations per day | 6,223,600  | 7,200  | 126,900   | 780,274,900   | Dominated |
| Vaccine supply 40%, pace 150,000 vaccinations per day | 7,758,800  | 10,600 | 175,100   | 927,247,000   | Dominated |
| Vaccine supply 67%, pace 150,000 vaccinations per day | 5,594,000  | 7,800  | 133,700   | 1,009,741,300 | Dominated |
| No vaccination                                        | 19,290,400 | 70,400 | 1,206,200 | 1,691,805,000 | Dominated |

564 USD: United States dollars. ICER: incremental cost-effectiveness ratio.  $R_e$ : effective reproduction number. Dominated: the strategy results in a  
 565 higher ICER than that of a more clinically effective strategy, or the strategy results in less clinical benefit (more years-of-life lost) and higher  
 566 health care costs than an alternative strategy.

567

568 <sup>a</sup>Within each  $R_e$  scenario, vaccination strategies are ordered from lowest to highest cost per convention of cost-effectiveness analysis. ICERs are  
 569 calculated compared to the next least expensive, non-dominated strategy. Displayed life-years and costs are rounded to the nearest hundred,  
 570 while ICERs are calculated based on non-rounded life-years and costs and then rounded to the nearest ten.

571

572 <sup>b</sup>When modeling a vaccination program that seeks to vaccinate 80% of the population, uptake among those eligible was increased to 80% to  
 573 avoid a scenario in which supply exceeds uptake. If uptake is not increased beyond 67%, then the strategy of vaccinating 67% of the population  
 574 provides the most clinical benefit and results in an ICER of \$9,960/YLS compared with vaccinating 40% of the population when  $R_e$  is 1.4 and  
 575 \$1,990/YLS in an epidemic scenario with periodic surges.

576

577 <sup>c</sup>In the analysis of an epidemic with periodic surges, the basic reproduction number ( $R_0$ ) alternates between low and high values over time, and  
 578 the  $R_e$  changes day-to-day as the epidemic and vaccination program progress and there are fewer susceptible individuals. For most of the  
 579 simulation horizon,  $R_0$  is 1.6 (equivalent to an initial  $R_e$  of 1.1). However, during days 90-150 and 240-300 of the simulation,  $R_0$  is increased to 2.6.  
 580 This results in two epidemic waves with peak  $R_e$  of approximately 1.4-1.5.

581

582

583 **Table 2. One-way sensitivity analyses of different COVID-19 vaccine characteristic and epidemic**  
 584 **growth scenarios in South Africa.**  
 585

| Parameter / Value                                                                                         | SARS-CoV-2 infections averted, compared with no vaccination | COVID-19 deaths averted, compared with no vaccination | Years-of-life saved, compared with no vaccination | Change in health care costs, compared with no vaccination, USD | ICER, compared with no vaccination, USD per YLS <sup>a</sup> |
|-----------------------------------------------------------------------------------------------------------|-------------------------------------------------------------|-------------------------------------------------------|---------------------------------------------------|----------------------------------------------------------------|--------------------------------------------------------------|
| Vaccine effectiveness in preventing SARS-CoV-2 infection, %                                               |                                                             |                                                       |                                                   |                                                                |                                                              |
| 20                                                                                                        | 5,466,500                                                   | 71,600                                                | 1,254,900                                         | -166,032,500                                                   | Cost-saving                                                  |
| 40 (base case)                                                                                            | 10,427,000                                                  | 74,600                                                | 1,299,100                                         | -428,052,700                                                   | Cost-saving                                                  |
| 50                                                                                                        | 12,758,000                                                  | 77,500                                                | 1,349,700                                         | -554,501,500                                                   | Cost-saving                                                  |
| 75 <sup>b</sup>                                                                                           | 16,067,300                                                  | 82,000                                                | 1,429,400                                         | -750,946,700                                                   | Cost-saving                                                  |
| Vaccine effectiveness in preventing mild/moderate COVID-19, % <sup>c</sup>                                |                                                             |                                                       |                                                   |                                                                |                                                              |
| 29                                                                                                        | 8,310,500                                                   | 74,000                                                | 1,298,900                                         | -377,101,700                                                   | Cost-saving                                                  |
| 51 (base case)                                                                                            | 10,427,000                                                  | 74,600                                                | 1,299,100                                         | -428,052,700                                                   | Cost-saving                                                  |
| 67                                                                                                        | 10,625,200                                                  | 76,200                                                | 1,332,200                                         | -410,883,200                                                   | Cost-saving                                                  |
| 79                                                                                                        | 10,722,500                                                  | 75,300                                                | 1,316,800                                         | -399,131,600                                                   | Cost-saving                                                  |
| Vaccine effectiveness in preventing severe or critical COVID-19 requiring hospitalization, % <sup>d</sup> |                                                             |                                                       |                                                   |                                                                |                                                              |
| 40                                                                                                        | 10,659,300                                                  | 65,800                                                | 1,180,100                                         | -80,901,300                                                    | Cost-saving                                                  |
| 86 (base case)                                                                                            | 10,427,000                                                  | 74,600                                                | 1,299,100                                         | -428,052,700                                                   | Cost-saving                                                  |
| 98                                                                                                        | 10,690,200                                                  | 77,500                                                | 1,341,700                                         | -545,358,200                                                   | Cost-saving                                                  |
| Vaccine acceptance among those eligible, %                                                                |                                                             |                                                       |                                                   |                                                                |                                                              |
| 50                                                                                                        | 10,026,700                                                  | 71,100                                                | 1,251,600                                         | -272,592,000                                                   | Cost-saving                                                  |
| 67 (base case)                                                                                            | 10,427,000                                                  | 74,600                                                | 1,299,100                                         | -428,052,700                                                   | Cost-saving                                                  |
| 90                                                                                                        | 10,562,000                                                  | 79,200                                                | 1,360,000                                         | -526,334,700                                                   | Cost-saving                                                  |

**Table 2, continued.**

| Parameter / Value                                      | SARS-CoV-2 infections averted, compared with no vaccination | COVID-19 deaths averted, compared with no vaccination | Years-of-life saved, compared with no vaccination | Change in health care costs, compared with no vaccination, USD | ICER, compared with no vaccination, USD per YLS <sup>a</sup> |
|--------------------------------------------------------|-------------------------------------------------------------|-------------------------------------------------------|---------------------------------------------------|----------------------------------------------------------------|--------------------------------------------------------------|
| Vaccination cost per person, USD                       |                                                             |                                                       |                                                   |                                                                |                                                              |
| 9                                                      | 10,427,000                                                  | 74,600                                                | 1,299,100                                         | -656,846,300                                                   | Cost-saving                                                  |
| 14.81 (base case)                                      | 10,427,000                                                  | 74,600                                                | 1,299,100                                         | -428,052,700                                                   | Cost-saving                                                  |
| 25                                                     | 10,427,000                                                  | 74,600                                                | 1,299,100                                         | -26,778,000                                                    | Cost-saving                                                  |
| 26                                                     | 10,427,000                                                  | 74,600                                                | 1,299,100                                         | 12,601,200                                                     | 10                                                           |
| 35                                                     | 10,427,000                                                  | 74,600                                                | 1,299,100                                         | 367,014,600                                                    | 280                                                          |
| 45                                                     | 10,427,000                                                  | 74,600                                                | 1,299,100                                         | 760,807,300                                                    | 590                                                          |
| 75                                                     | 10,427,000                                                  | 74,600                                                | 1,299,100                                         | 1,942,185,200                                                  | 1,500                                                        |
| R <sub>e</sub>                                         |                                                             |                                                       |                                                   |                                                                |                                                              |
| 1.1                                                    | 2,640,400                                                   | 6,600                                                 | 98,000                                            | 299,493,000                                                    | 3,050                                                        |
| 1.4 (base case)                                        | 10,427,000                                                  | 74,600                                                | 1,299,100                                         | -428,052,700                                                   | Cost-saving                                                  |
| 1.8                                                    | 5,955,700                                                   | 110,500                                               | 1,957,700                                         | 129,359,500                                                    | 70                                                           |
| Two-wave epidemic <sup>e</sup>                         | 13,696,300                                                  | 62,700                                                | 1,072,500                                         | -682,063,700                                                   | Cost-saving                                                  |
| Prior immunity to SARS-CoV-2, % of population          |                                                             |                                                       |                                                   |                                                                |                                                              |
| 10                                                     | 8,025,900                                                   | 147,200                                               | 2,581,000                                         | 85,889,700                                                     | 30                                                           |
| 20                                                     | 9,087,700                                                   | 119,000                                               | 2,168,000                                         | 55,790,700                                                     | 30                                                           |
| 30 (base case)                                         | 10,427,000                                                  | 74,600                                                | 1,299,100                                         | -428,052,700                                                   | Cost-saving                                                  |
| 40                                                     | 7,127,300                                                   | 18,000                                                | 279,500                                           | -252,757,900                                                   | Cost-saving                                                  |
| 50                                                     | 608,300                                                     | 1,500                                                 | 24,300                                            | 545,399,700                                                    | 22,460                                                       |
| Initial prevalence of active COVID-19, % of population |                                                             |                                                       |                                                   |                                                                |                                                              |
| 0.05% <sup>f</sup>                                     | 12,247,900                                                  | 70,300                                                | 1,269,000                                         | -557,621,500                                                   | Cost-saving                                                  |
| 0.1% (base case)                                       | 10,427,000                                                  | 74,600                                                | 1,299,100                                         | -428,052,700                                                   | Cost-saving                                                  |
| 0.2%                                                   | 8,403,300                                                   | 72,300                                                | 1,288,700                                         | -180,874,600                                                   | Cost-saving                                                  |
| 0.5%                                                   | 6,028,800                                                   | 64,100                                                | 1,119,800                                         | 51,633,800                                                     | 50                                                           |

586 USD: United States dollars. ICER: incremental cost-effectiveness ratio. YLS: year-of-life saved. R<sub>e</sub>:  
 587 effective reproduction number.  
 588

589 <sup>a</sup>In these scenario analyses, the reference vaccination program (67% supply, 150,000 vaccinations per  
590 day) is compared with no vaccination program under different scenarios. Displayed life-years and costs  
591 are rounded to the nearest hundred, while ICERs are calculated based on non-rounded life-years and  
592 costs and then rounded to the nearest ten. Cost-saving reflects more years-of-life (greater clinical  
593 benefit) and lower costs, and therefore ICERs are not displayed.  
594

595 <sup>b</sup>In the scenario analysis of a vaccine with 75% effectiveness in preventing SARS-CoV-2 infection, the  
596 effectiveness in preventing mild/moderate COVID-19 disease was adjusted to avoid a scenario in which a  
597 vaccine has higher effectiveness in preventing infection than it does in preventing symptomatic disease.  
598

599 <sup>c</sup>Vaccine effectiveness in preventing mild/moderate COVID-19 (apart from severe/critical disease) has  
600 minimal impact on the number of deaths. Therefore, seemingly counterintuitive results are due to  
601 stochastic variability in the microsimulation. In the analysis of a vaccine that is 29% effective in  
602 preventing mild/moderate COVID-19, the vaccine effectiveness in preventing SARS-CoV-2 infection was  
603 adjusted to avoid a scenario in which a vaccine is more effective in preventing infection than in  
604 preventing symptomatic disease.  
605

606 <sup>d</sup>Vaccine effectiveness in preventing severe/critical COVID-19 itself has minimal impact on transmission  
607 and the number of infections. Therefore, seemingly counterintuitive results are due to stochastic  
608 variability in the microsimulation. In the analysis of a vaccine that is 40% effective in preventing severe  
609 COVID-19 requiring hospitalization, the vaccine effectiveness in preventing mild/moderate COVID-19  
610 was adjusted to avoid a scenario in which a vaccine is more effective in preventing symptomatic disease  
611 than in preventing severe disease requiring hospitalization.  
612

613 <sup>e</sup>In the analysis of an epidemic with periodic surges, the basic reproduction number ( $R_0$ ) alternates  
614 between low and high values over time, and the  $R_e$  changes day-to-day as the epidemic and vaccination  
615 program progress and there are fewer susceptible individuals. For most of the simulation horizon,  $R_0$  is  
616 1.6 (equivalent to an initial  $R_e$  of 1.1). However, during days 90-150 and 240-300 of the simulation,  $R_0$  is  
617 increased to 2.6. This results in two epidemic waves with peak  $R_e$  of approximately 1.4-1.5.  
618

619 <sup>f</sup>When the initial prevalence of active SARS-CoV-2 infection is 0.05% the epidemic peak occurs more  
620 than 180 days into the simulation. Because our modeled time horizon only considers outcomes  
621 occurring through day 360, delaying the epidemic peak leads to a small decrease in the number of  
622 infections and deaths that are recorded in the scenario without vaccines. As a result, the absolute  
623 number of deaths prevented by vaccination decreases slightly as initial prevalence of active infection is  
624 changed from 0.1% to 0.05%, even though a greater proportion of deaths are prevented.



625 **Table 3. Input parameters for a model-based analysis of COVID-19 vaccination in South Africa.**

| Parameter                                                                                    | Base case value (Range)   | Sources                                 |
|----------------------------------------------------------------------------------------------|---------------------------|-----------------------------------------|
| <b>Initial state</b>                                                                         |                           |                                         |
| Age distribution, %                                                                          |                           | 43                                      |
| <20 years                                                                                    | 37                        |                                         |
| 20-59 years                                                                                  | 54                        |                                         |
| ≥60 years                                                                                    | 9                         |                                         |
| Initial health state distribution, %                                                         |                           |                                         |
| Susceptible                                                                                  | 69.9 (49.9-89.9)          | Assumption                              |
| Infected with SARS-CoV-2                                                                     | 0.1 (0.05 -0.5)           | Assumption <sup>a</sup>                 |
| Recovered (prior immunity)                                                                   | 30 (10-50)                | 15,44-46                                |
| <b>Transmission dynamics</b>                                                                 |                           |                                         |
| Effective reproduction number, $R_e$                                                         | 1.4 (1.1-1.8)             | 49                                      |
| Time to start of epidemic wave, days                                                         | 0 (0-90)                  | Assumption                              |
| Relative reduction in onward transmission rate among vaccinated individuals, %               | 0 (0-50)                  | Assumption                              |
| <b>Hospital and ICU care</b>                                                                 |                           |                                         |
| Resource availabilities                                                                      |                           |                                         |
| Hospital beds, daily, n                                                                      | 119,400                   | 50                                      |
| ICU beds, daily, n                                                                           | 3,300                     | 50                                      |
| Costs                                                                                        |                           |                                         |
| Hospitalization, daily, USD                                                                  | 154 (77-309)              | 52-55                                   |
| ICU care <sup>b</sup> , daily, USD                                                           | 1,751 (798-3,502)         | 53-56                                   |
| <b>Vaccination program strategies</b>                                                        |                           |                                         |
| Vaccine supply, % of population                                                              | 67 (20-80)                | 16                                      |
| Vaccinations per day, n                                                                      | 150,000 (150,000-300,000) | 17,18                                   |
| Time to rollout start, days                                                                  | 0 (0-60)                  | Assumption                              |
| <b>Vaccine characteristics<sup>c</sup></b>                                                   |                           |                                         |
| Effectiveness in preventing SARS-CoV-2 infection, %                                          | 40 (20-75)                | Assumption                              |
| Effectiveness in preventing mild/moderate COVID-19 disease <sup>d</sup> , %                  | 51 (29-79)                | Age-dependent assumptions, <sup>4</sup> |
| Effectiveness in preventing severe or critical COVID-19 disease requiring hospitalization, % | 86 (40-98)                | 4                                       |
| Number of doses required for effectiveness                                                   | 1                         | 4                                       |
| Time to effectiveness, days post-vaccination                                                 | 14                        | 4                                       |
| Vaccine uptake among those eligible, %                                                       | 67 (50-90)                | 48                                      |
| Vaccination cost per person, USD                                                             | 14.81 (9-75)              | 21-23,54,55                             |

626  $R_e$ : effective reproduction number. ICU: intensive care unit. USD: United States dollars.

627  
628 Ranges reflect values examined in analyses of alternative vaccination program strategies and in  
629 sensitivity analyses of different vaccine characteristics and epidemic growth scenarios.

630  
631 <sup>a</sup>Initial prevalence of each state of infection and disease are in Supplementary Table 5.

632

633 <sup>b</sup>The range of ICU care costs includes the cost (from Edoaka et al.<sup>53</sup>) applied in a repeat of several of the  
634 main analyses.

635

636 <sup>c</sup>In the base case, we model a vaccination program based on characteristics of the Johnson &  
637 Johnson/Janssen Ad26.COVS vaccine.<sup>4</sup> In sensitivity analyses, vaccine effectiveness and cost are varied  
638 across a range of possible values to evaluate the influence of these parameters on clinical and economic  
639 outcomes and to account for uncertainty around published estimates.

640

641 <sup>d</sup>Values reflect the weighted average of vaccine effectiveness in preventing mild/moderate COVID-19  
642 across age groups. Our modeled vaccine effectiveness in preventing mild/moderate COVID-19 was  
643 specified in an age-dependent manner to reflect the reported efficacy of the Ad26.COVS vaccine in  
644 preventing moderate to severe/critical COVID-19 in South Africa.<sup>4</sup> In the base case, this results in 52%  
645 effectiveness in preventing any symptomatic COVID-19 across all age groups. In sensitivity analysis, this  
646 value is varied from 30% to 79%.

647 **Figure 1. One-way sensitivity analysis, influence of each parameter on cumulative SARS-CoV-2**  
648 **infections, COVID-19 deaths, and health care costs.** This tornado diagram demonstrates the relative  
649 influence of varying each key model parameter on clinical and economic outcomes over 360 days. This is  
650 intended to reflect the different scenarios in which a reference vaccination program (vaccine supply  
651 sufficient for 67% of South Africa’s population, pace 150,000 vaccinations per day) might be  
652 implemented. The dashed line represents the base case scenario for each parameter. Each parameter is  
653 listed on the vertical axis, and in parentheses are the base case value and, after a colon, the range  
654 examined. The number on the left of the range represents the left-most part of the corresponding bar,  
655 and the number on the right of the range represents the right-most part of the corresponding bar. The  
656 horizontal axis shows the following outcomes of a reference vaccination program: (a) cumulative SARS-  
657 CoV-2 infections; (b) cumulative COVID-19 deaths; (c) cumulative health care costs. In some analyses,  
658 the lowest or highest value of an examined parameter produced a result that fell in the middle of the  
659 displayed range of results, due to stochastic variability when the range of results was narrow.

660 **Figure 2. Multi-way sensitivity analysis of vaccine effectiveness against infection and vaccination cost:**  
661 **incremental cost-effectiveness ratio of vaccination program compared with no vaccination.** Each box  
662 in the 4x4 plot is colored according to the incremental cost-effectiveness ratio (ICER). The lightest color  
663 represents scenarios in which a reference vaccination program (vaccine supply sufficient for 67% of  
664 South Africa’s population, pace 150,000 vaccinations per day) is cost-saving compared with no  
665 vaccination program, meaning that it results in clinical benefit and reduces overall health care costs. The  
666 darker colors reflect increasing ICERs, whereby a reference vaccination program, compared with no  
667 vaccination program, results in both clinical benefit and higher overall health care costs. The ICER is the  
668 model-generated difference in costs divided by the difference in years-of-life between a reference  
669 vaccination program and no vaccination program. In none of these scenarios is the ICER above  
670 \$2,000/year-of-life saved (YLS).  
671  
672

**a****Infections**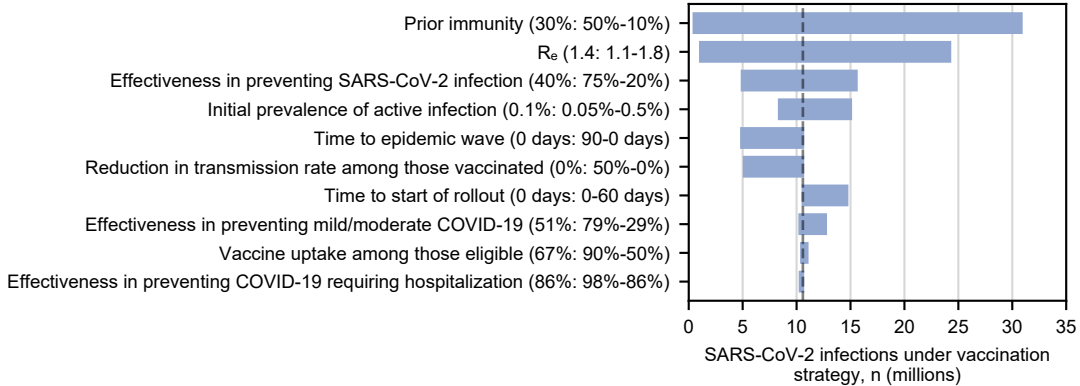**b****Deaths**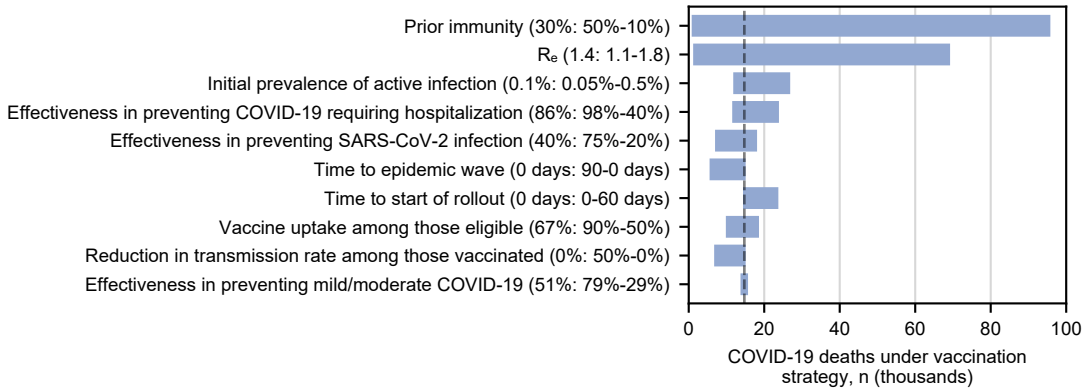**c****Costs**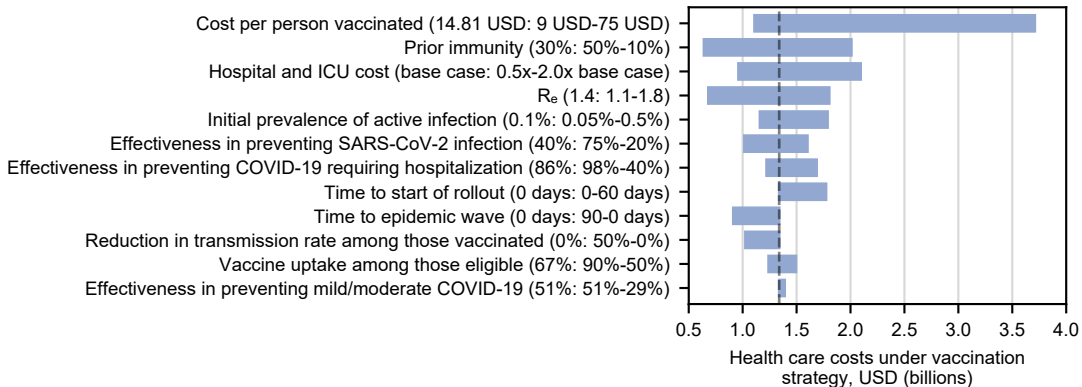

### Incremental cost-effectiveness ratio vs no vaccination

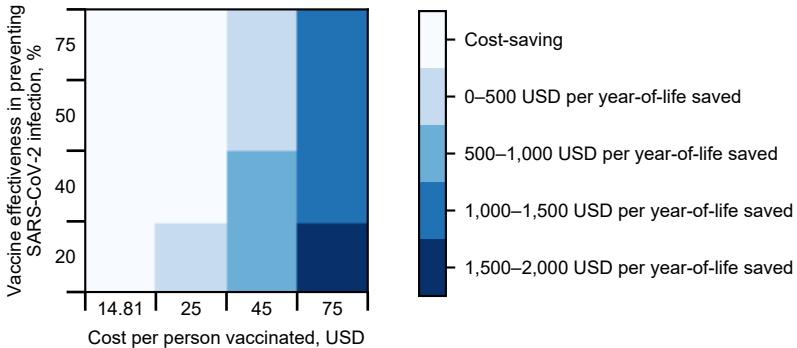

Source: https://medrxiv.org/content/10.1101/2021.05.07.21256852v2.full.pdf
